# Supplementary material for: Smart design of a therapeutic nanoplatform for mitochondria-targeted copper-depletion therapy combined with chemotherapy
Source: Royal Society of Chemistry journal article supplement (doi:10.1039/d3tb00979c), 2023-01-01
Supplement: d3tb00979c1.pdf [file d3tb00979c1.pdf]

## Supplementary Information

### Smart design of therapeutic nanoplatform for mitochondria-targeted copper-depletion therapy combined with chemotherapy

Taishun Hu,<sup>∞a</sup> Xiyu Gong,<sup>∞b</sup> Xinli Liu,<sup>a</sup> Hui Xu,<sup>c</sup> Fangfang Zhou,<sup>b</sup> Songwen Tan<sup>d</sup> and Yongju He<sup>\*a</sup>

<sup>a</sup> School of Materials Science and Engineering, Central South University, Changsha, Hunan 410083, China

<sup>b</sup> Department of Neurology, the Second Xiangya Hospital of Central South University, Changsha 410011, Hunan, China

<sup>c</sup> Institute of Super-Microstructure and Ultrafast Process in Advanced Materials, School of Physics and Electronics, Central South University, Changsha, Hunan 410083, China

<sup>d</sup> Xiangya School of Pharmaceutical Sciences, Central South University, Changsha, Hunan 410013, China

<sup>∞</sup> The authors contribute equally.

\* Corresponding author: [heyongju@csu.edu.cn](mailto:heyongju@csu.edu.cn) (Yongju He)

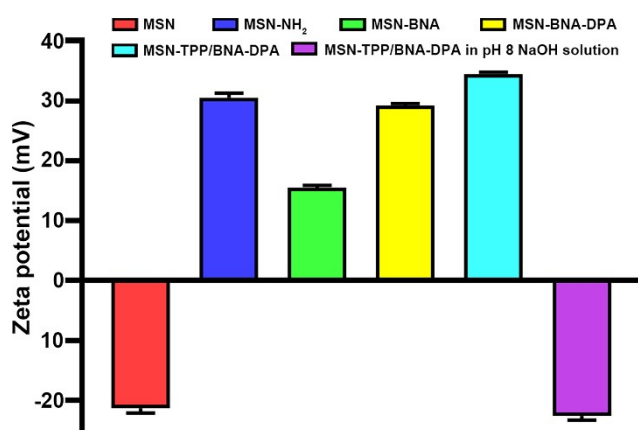

**Fig. S1.** Zeta potential of MSN, MSN-NH<sub>2</sub>, MSN-BNA, MSN-BNA-DPA and MSN-TPP/BNA-DPA in deionized water and MSN-TPP/BNA-DPA in pH 8 NaOH solution.

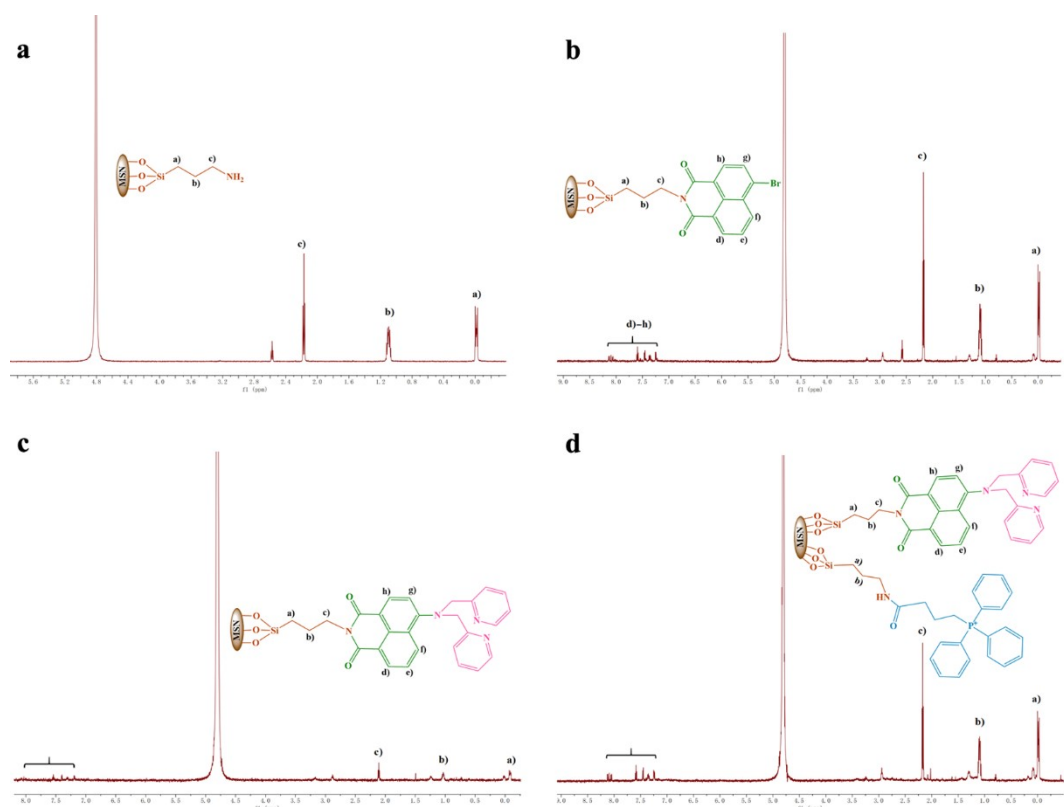

**Fig. S2.** Solution  $^1\text{H}$ NMR (pH=13) with peaks assigned for the inset molecules.  $^1\text{H}$ NMR spectra of (a) MSN-NH<sub>2</sub>, (b) MSN-BNA, (c) MSN-BNA-DPA and (d) MSN-TPP/BNA-DPA.

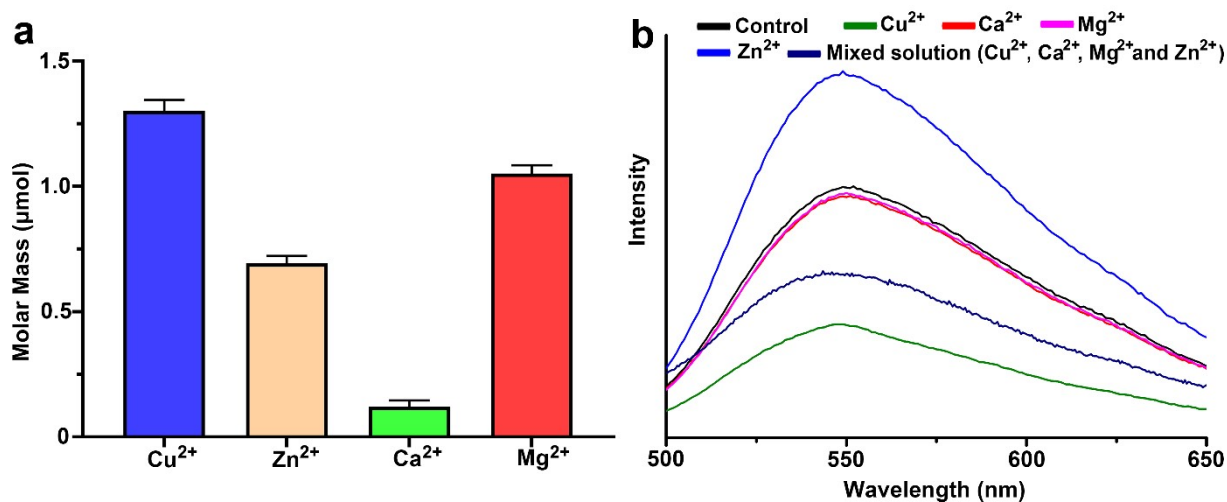

**Fig. S3.** (a) Depleting amount of various divalent metal cations by MSN-TPP/BNA-DPA (3 mg) after 24 h incubation with a mixed solution simultaneously containing 2  $\mu\text{mol}$  of various divalent cations. (b) Fluorescence spectra of MSN-TPP/BNA-DPA suspension after mixing with various metal cations.

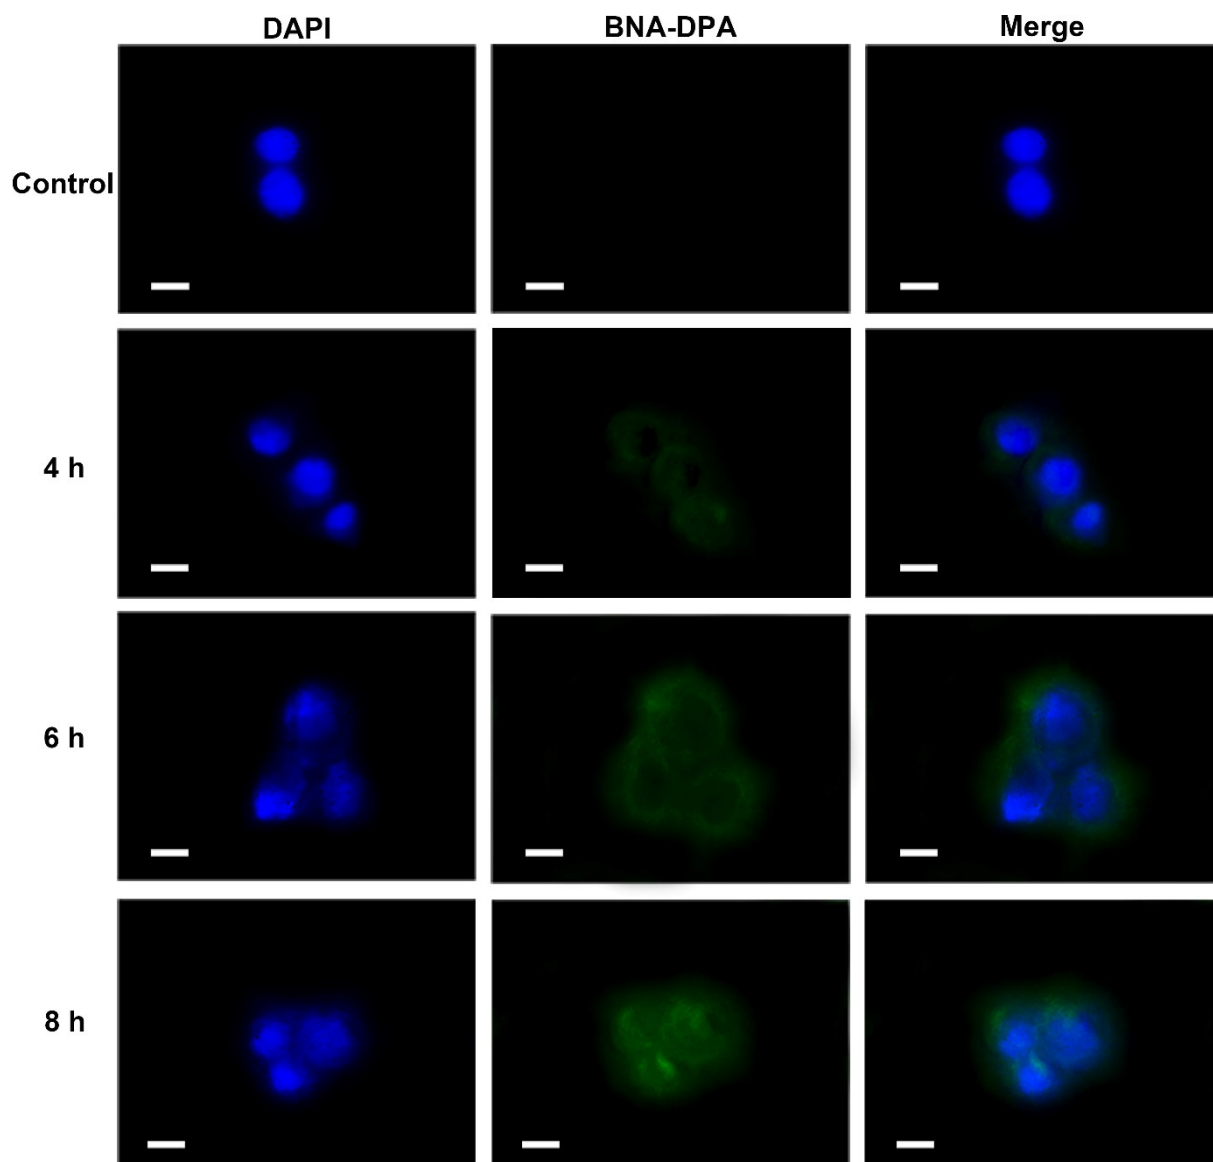

**Fig. S4.** Cellular uptake of MSN-TPP/BNA-DPA in 4T1 cells. Scale bar 20  $\mu\text{m}$ .

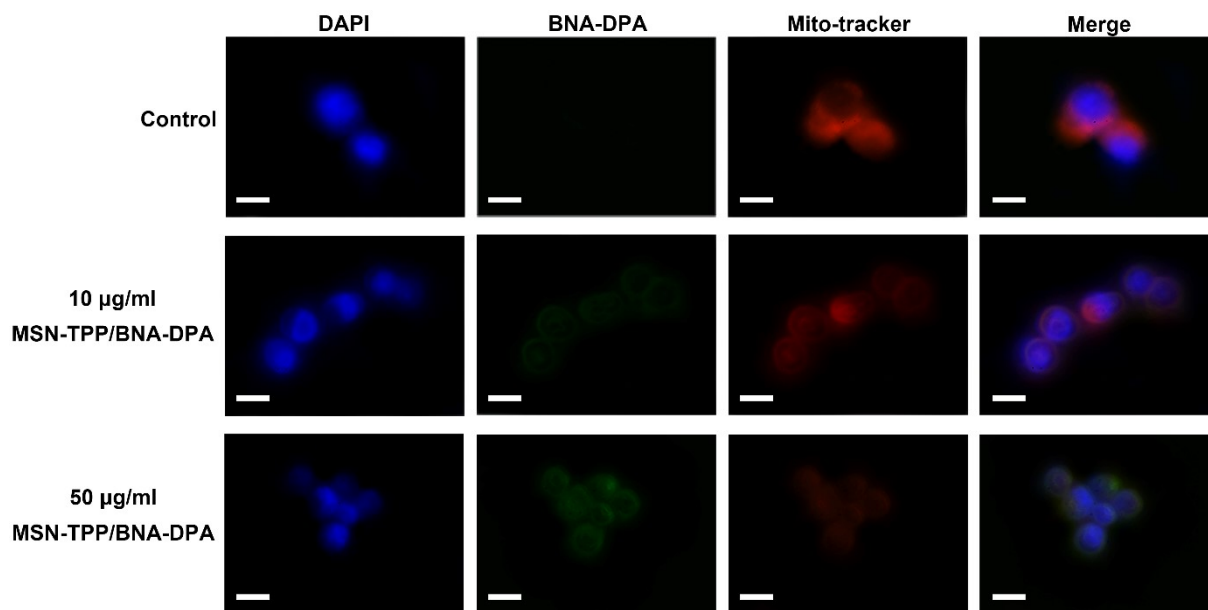

**Fig. S5.** Representative images of 4T1 cells after treatment with different concentrations of MSN-TPP/BNA-DPA to evaluate dose-dependent compromised mitochondrial membrane integrity. Scale bar 50 µm.

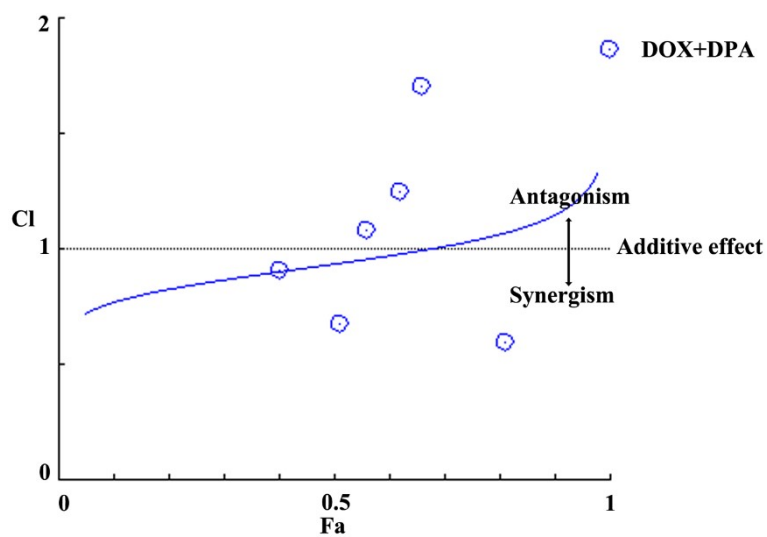

**Fig. S6.** Fa-CI plot (Chou-Talalay plot).

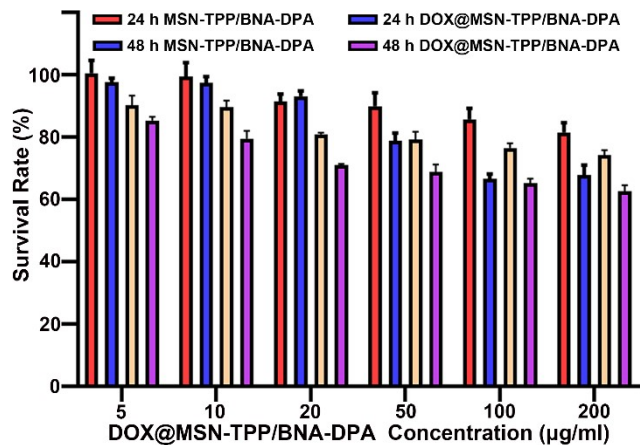

**Fig. S7.** Cell viability of movas cells after 24 and 48 h treatment with different concentration of MSN-TPP/BNA-DPA and DOX@MSN-TPP/BNA-DPA.

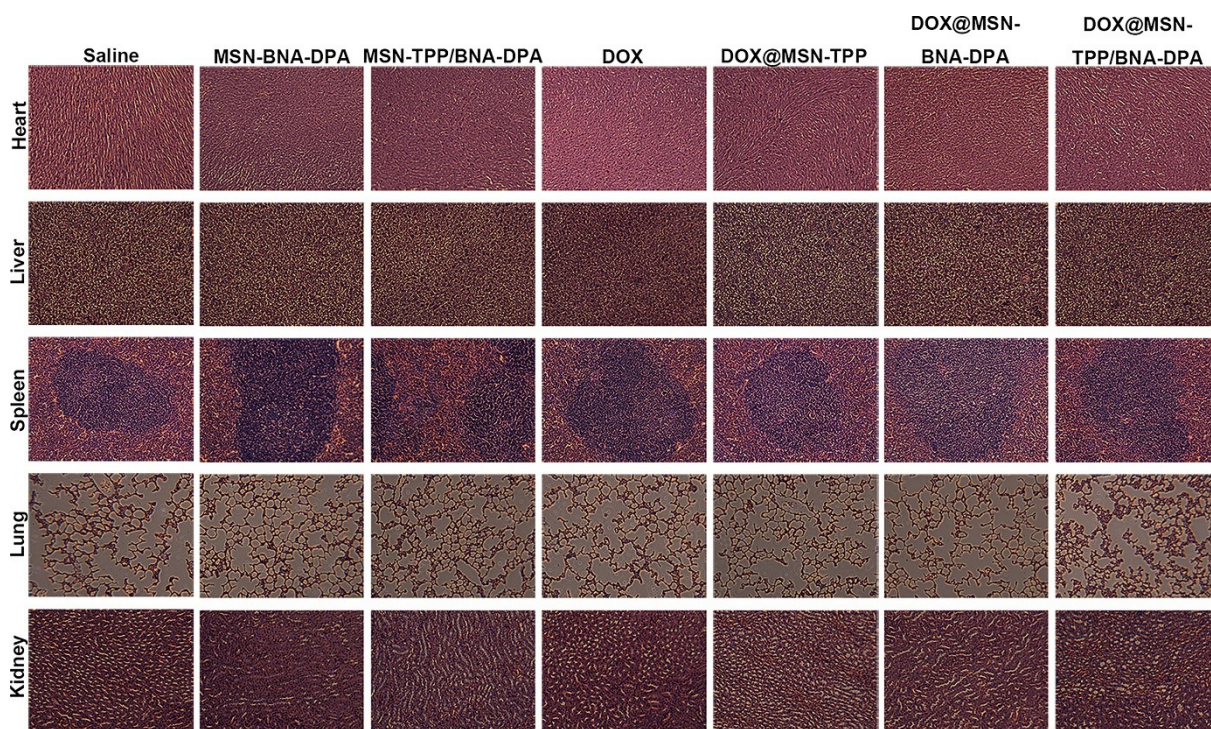

**Fig. S8.** H&E images of the major organs taken from 4T1 tumor-bearing mice on day 13 post-treatment with different formulations.

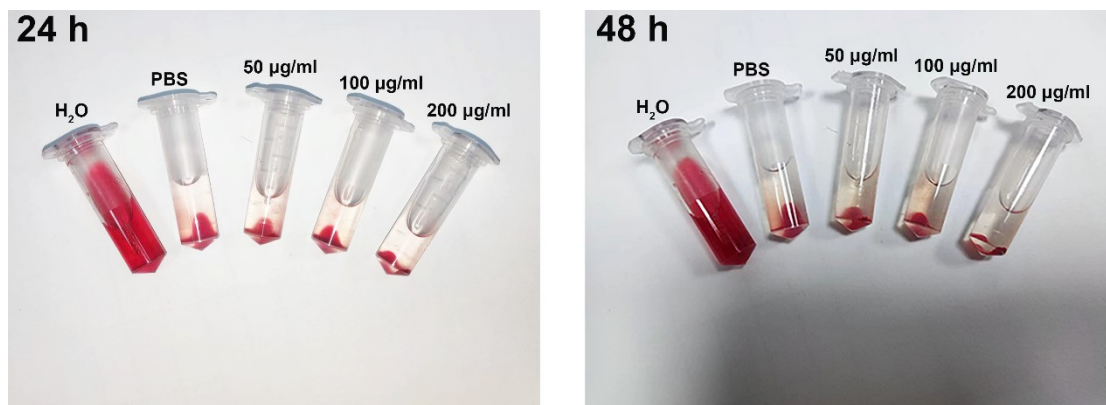

**Fig. S9.** Hemolysis assay of DOX@MSN-TPP/BNA-DPA after incubation with RBC suspension for 24 and 48 h.

**Table S1.** Quantitative measurement of intracellular copper levels of 4T1 cells after treatment with different nanoparticles (100 µg/ml) for 24 h.

| 4T1 cells                 | Copper content (ng/10 <sup>5</sup> cells) |
|---------------------------|-------------------------------------------|
| Control                   | 3.12 ± 0.88                               |
| MSN-TPP treatment         | 2.88 ± 0.88                               |
| MSN-BNA-DPA treatment     | < 1                                       |
| MSN-TPP/BNA-DPA treatment | < 1                                       |

**Table S2.** Quantitative measurement of intracellular copper levels of 4T1 cells after Cu<sup>2+</sup> supplement and subsequent treatment with MSN-TPP/BNA-DPA (100 µg/ml) for 12 h.

| 4T1 cells                                                       | Copper content (µg/10 <sup>6</sup> cells) |
|-----------------------------------------------------------------|-------------------------------------------|
| 2 µg/ml Cu <sup>2+</sup> supplement                             | 2.92 ± 0.14                               |
| 2 µg/ml Cu <sup>2+</sup> supplement + MSN-TPP/BNA-DPA treatment | 2.82 ± 0.06                               |
| 4 µg/ml Cu <sup>2+</sup> supplement                             | 3.32 ± 0.30                               |
| 4 µg/ml Cu <sup>2+</sup> supplement + MSN-TPP/BNA-DPA treatment | 3.07 ± 0.15                               |

**Table S3.** Dose-effect and combinational index (CI) values of DOX and DPA in DOX@MSN-TPP/BNA-DPA. CI < 1 shows the synergistic effects of the drugs whereas CI=1 shows additive and CI > 1 shows the antagonistic effect.

| <b>Drug</b> | <b>Dose<br/>(<math>\mu\text{g/ml}</math>)</b> | <b>Effect (Inhibition<br/>%)</b> | <b>CI value</b> |
|-------------|-----------------------------------------------|----------------------------------|-----------------|
| DOX         | 0.45                                          | 0.33                             |                 |
|             | 0.90                                          | 0.45                             |                 |
|             | 2.24                                          | 0.51                             |                 |
|             | 4.48                                          | 0.6                              |                 |
|             | 8.96                                          | 0.64                             |                 |
|             | 17.92                                         | 0.76                             |                 |
| DPA         | 0.18                                          | 0.28                             |                 |
|             | 0.36                                          | 0.37                             |                 |
|             | 0.91                                          | 0.44                             |                 |
|             | 1.81                                          | 0.53                             |                 |
|             | 3.62                                          | 0.62                             |                 |
|             | 7.24                                          | 0.66                             |                 |
| DOX+DPA     | 0.45+0.18                                     | 0.40                             | 0.91            |
|             | 0.89+0.36                                     | 0.51                             | 0.68            |
|             | 2.24+0.91                                     | 0.56                             | 1.08            |
|             | 4.48+1.81                                     | 0.62                             | 1.25            |
|             | 8.96+3.62                                     | 0.66                             | 1.70            |
|             | 17.92+7.24                                    | 0.81                             | 0.60            |

**Table S4.** Routine blood test data of mice on day 14 after intravenous injection of DOX@MSN-TPP/BNA-DPA (20 mg/kg) and saline.

| Name   | Control         | 20 mg/kg MSN-TPP/BNA-DPA | Unit                |
|--------|-----------------|--------------------------|---------------------|
| WBC    | 7.8 ± 0.7       | 7.1 ± 0.6                | 10 <sup>9</sup> /L  |
| Lymph# | 5.83 ± 0.97     | 5.43 ± 0.57              | 10 <sup>9</sup> /L  |
| Mon#   | 0.23 ± 0.07     | 0.2 ± 0.01               | 10 <sup>9</sup> /L  |
| Gran#  | 1.73 ± 0.23     | 1.47 ± 0.07              | 10 <sup>9</sup> /L  |
| Lymph% | 74.27 ± 5.53    | 76.77 ± 1.13             | %                   |
| Mon%   | 3.07 ± 0.57     | 2.73 ± 0.23              | %                   |
| Gran%  | 22.67 ± 4.97    | 20.5 ± 0.9               | %                   |
| RBC    | 8.93 ± 0.02     | 9.30 ± 0.20              | 10 <sup>12</sup> /L |
| HGB    | 130 ± 2         | 135.33 ± 4.3             | g/L                 |
| HCT    | 45.7 ± 0.6      | 47.23 ± 1.23             | %                   |
| MCV    | 51.23 ± 0.53    | 50.83 ± 0.23             | fL                  |
| MCH    | 14.5 ± 0.2      | 14.5 ± 0.2               | pg                  |
| MCHC   | 284 ± 2         | 285.67 ± 1.67            | g/L                 |
| RDW    | 15.07 ± 0.57    | 15.1 ± 0.2               | %                   |
| PLT    | 1043.67 ± 82.67 | 939.33 ± 181.33          | 10 <sup>9</sup> /L  |
| MPV    | 5.2 ± 0.2       | 5.27 ± 0.13              | fL                  |
| PDW    | 16.27 ± 0.17    | 16.37 ± 0.07             | /                   |
| PCT    | 0.54 ± 0.03     | 0.495 ± 0.08             | %                   |
